# Supplementary figures and images for: Arctic's hidden hydrocarbon degradation microbes: investigating the effects of hydrocarbon contamination, biostimulation, and a surface washing agent on microbial communities and hydrocarbon biodegradation pathways in high-Arctic beaches
Source: PubMed Central journal article supplement — Environ Microbiome. 2024 Oct 31;19:81. doi: 10.1186/s40793-024-00626-w (PMC11526595; doi:10.1186/s40793-024-00626-w), 2024-10-31

**a**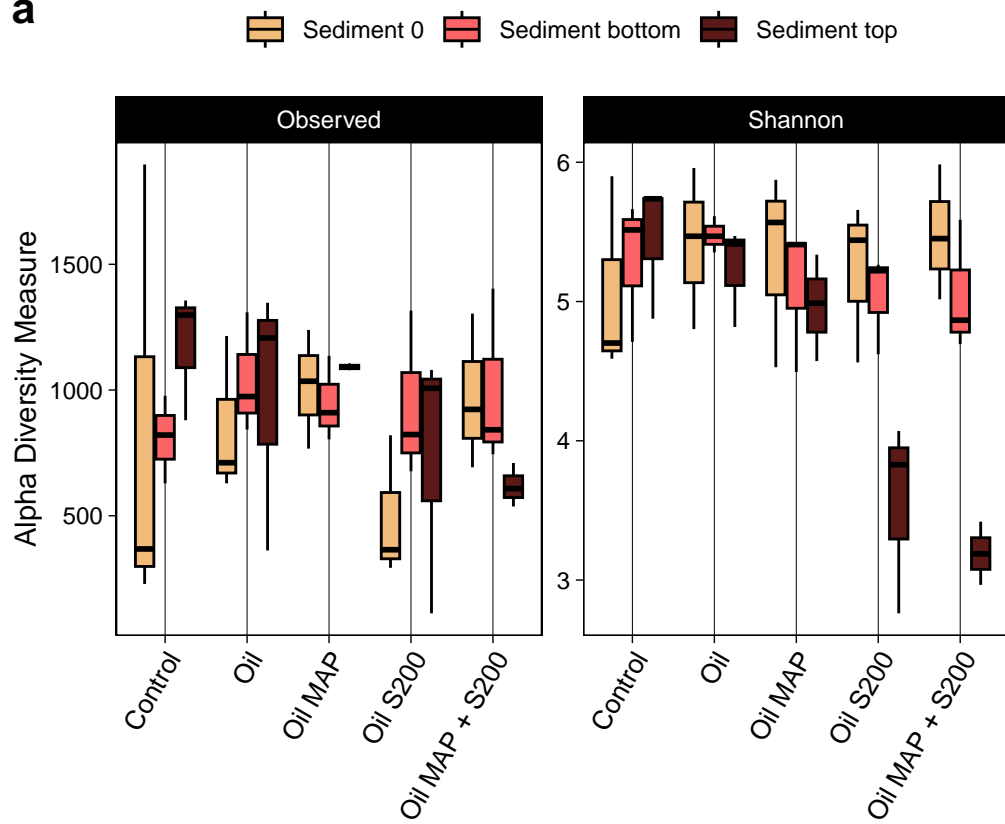**b**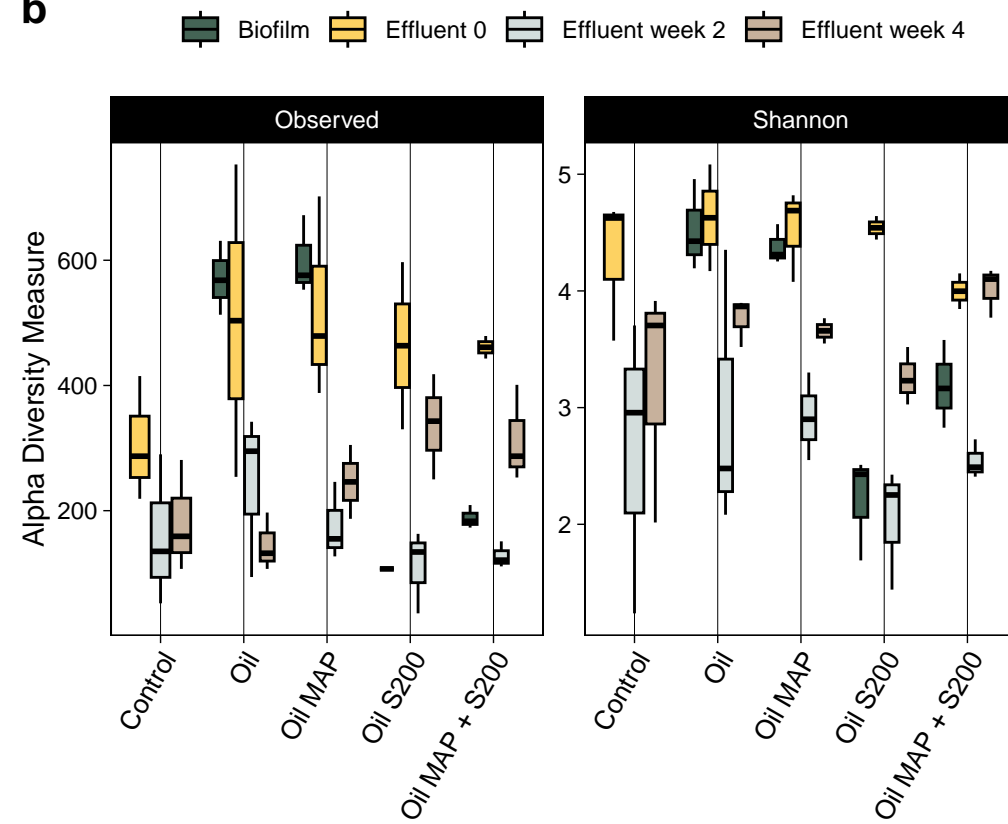**c**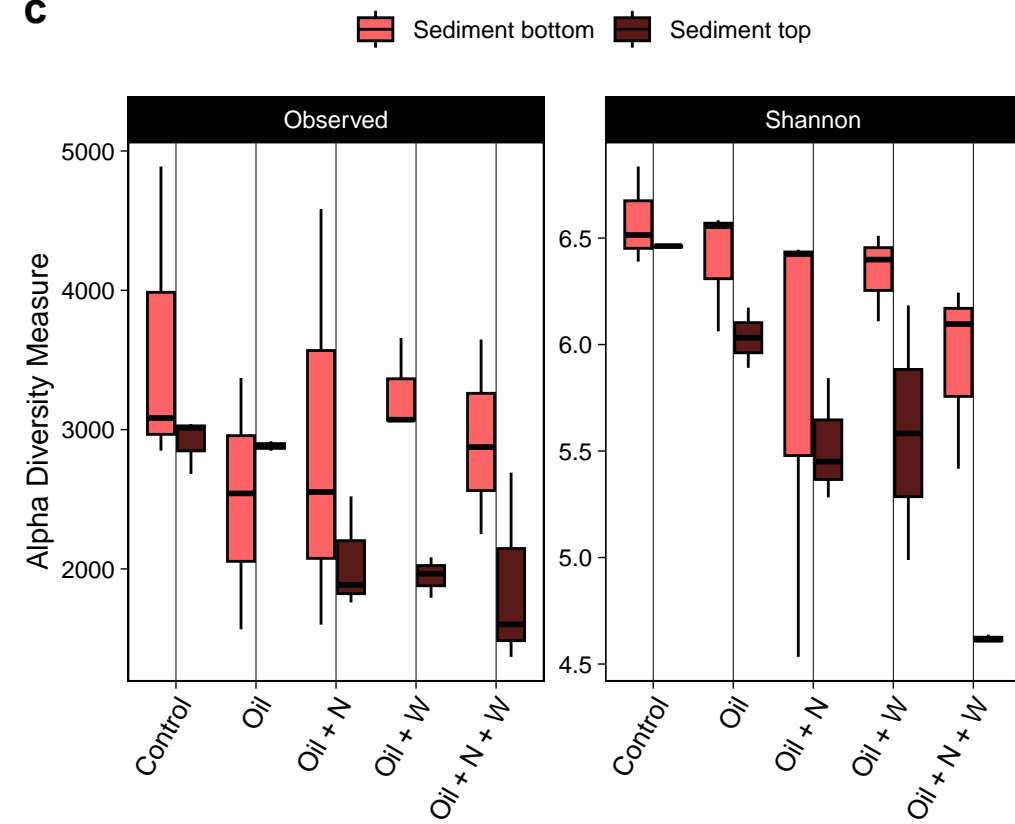**d**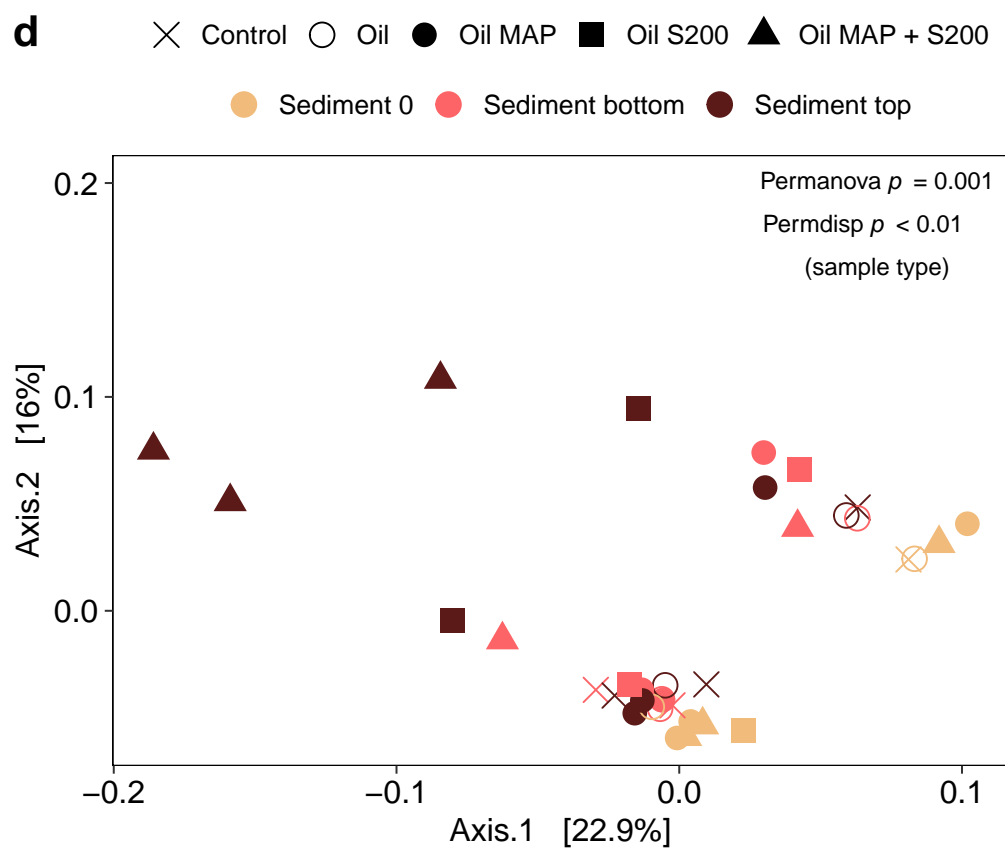**e**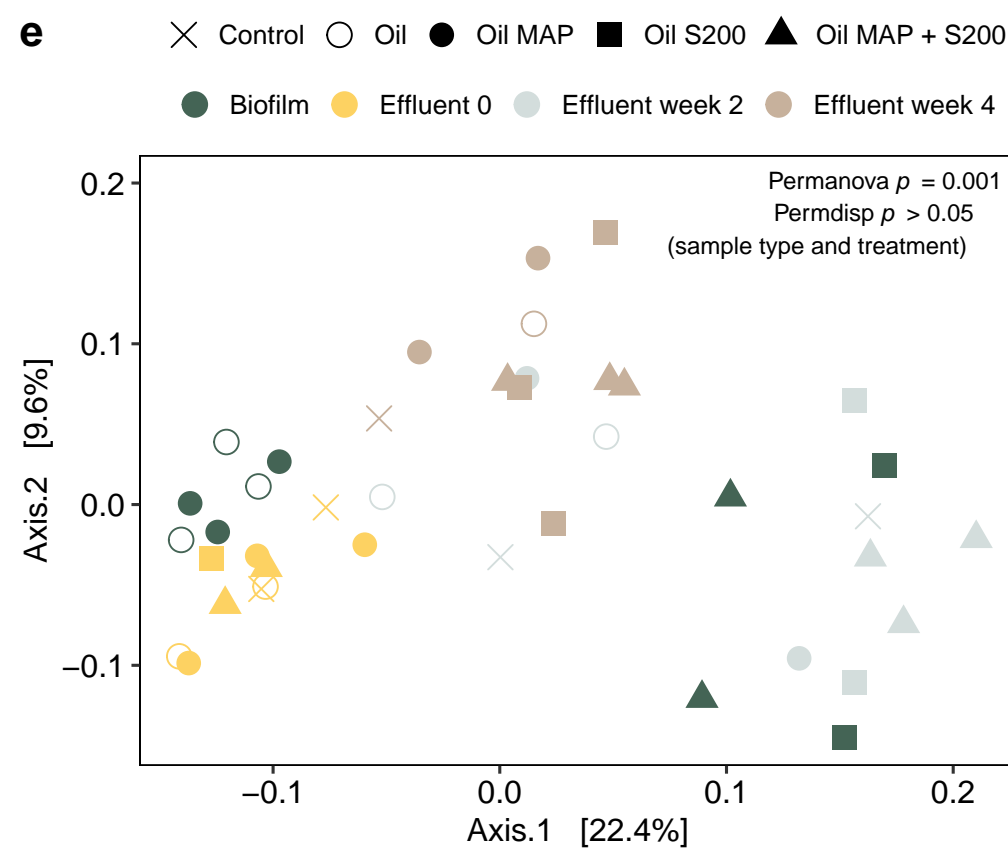**f**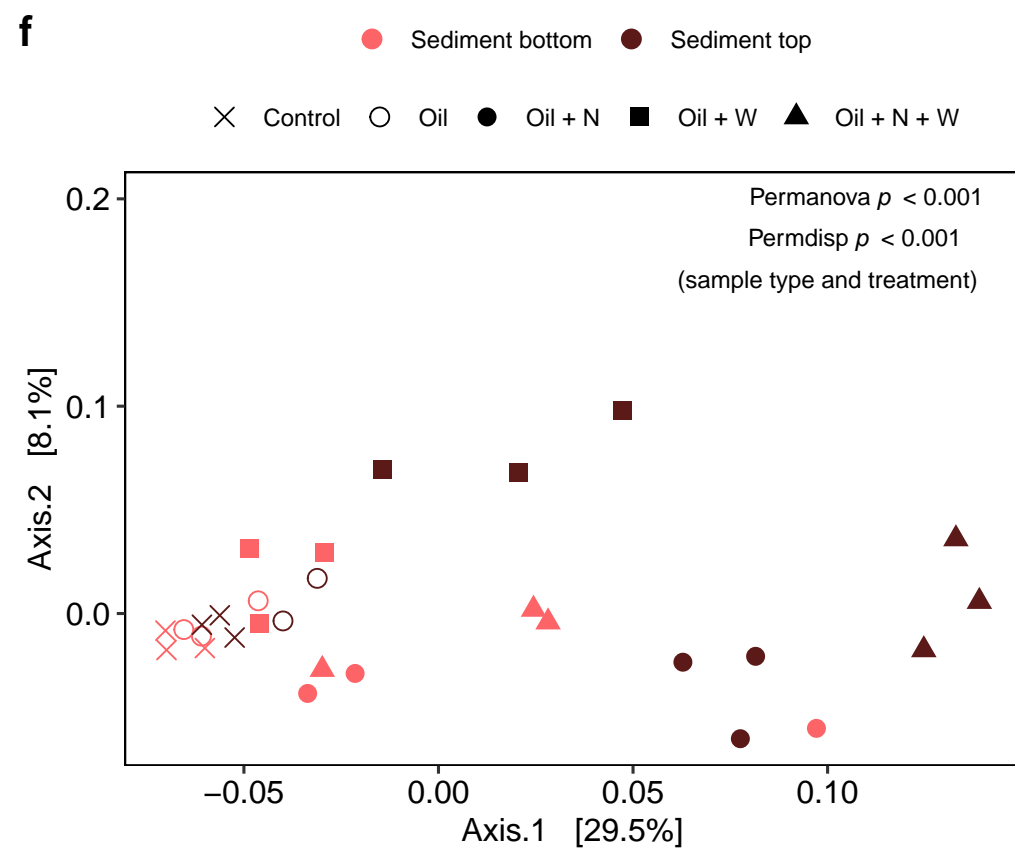

Supplement: 40793_2024_626_MOESM1_ESM.pdf [file 40793_2024_626_MOESM1_ESM.pdf]

Relative abundance (%)

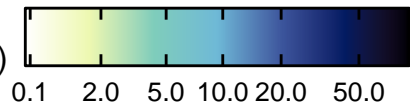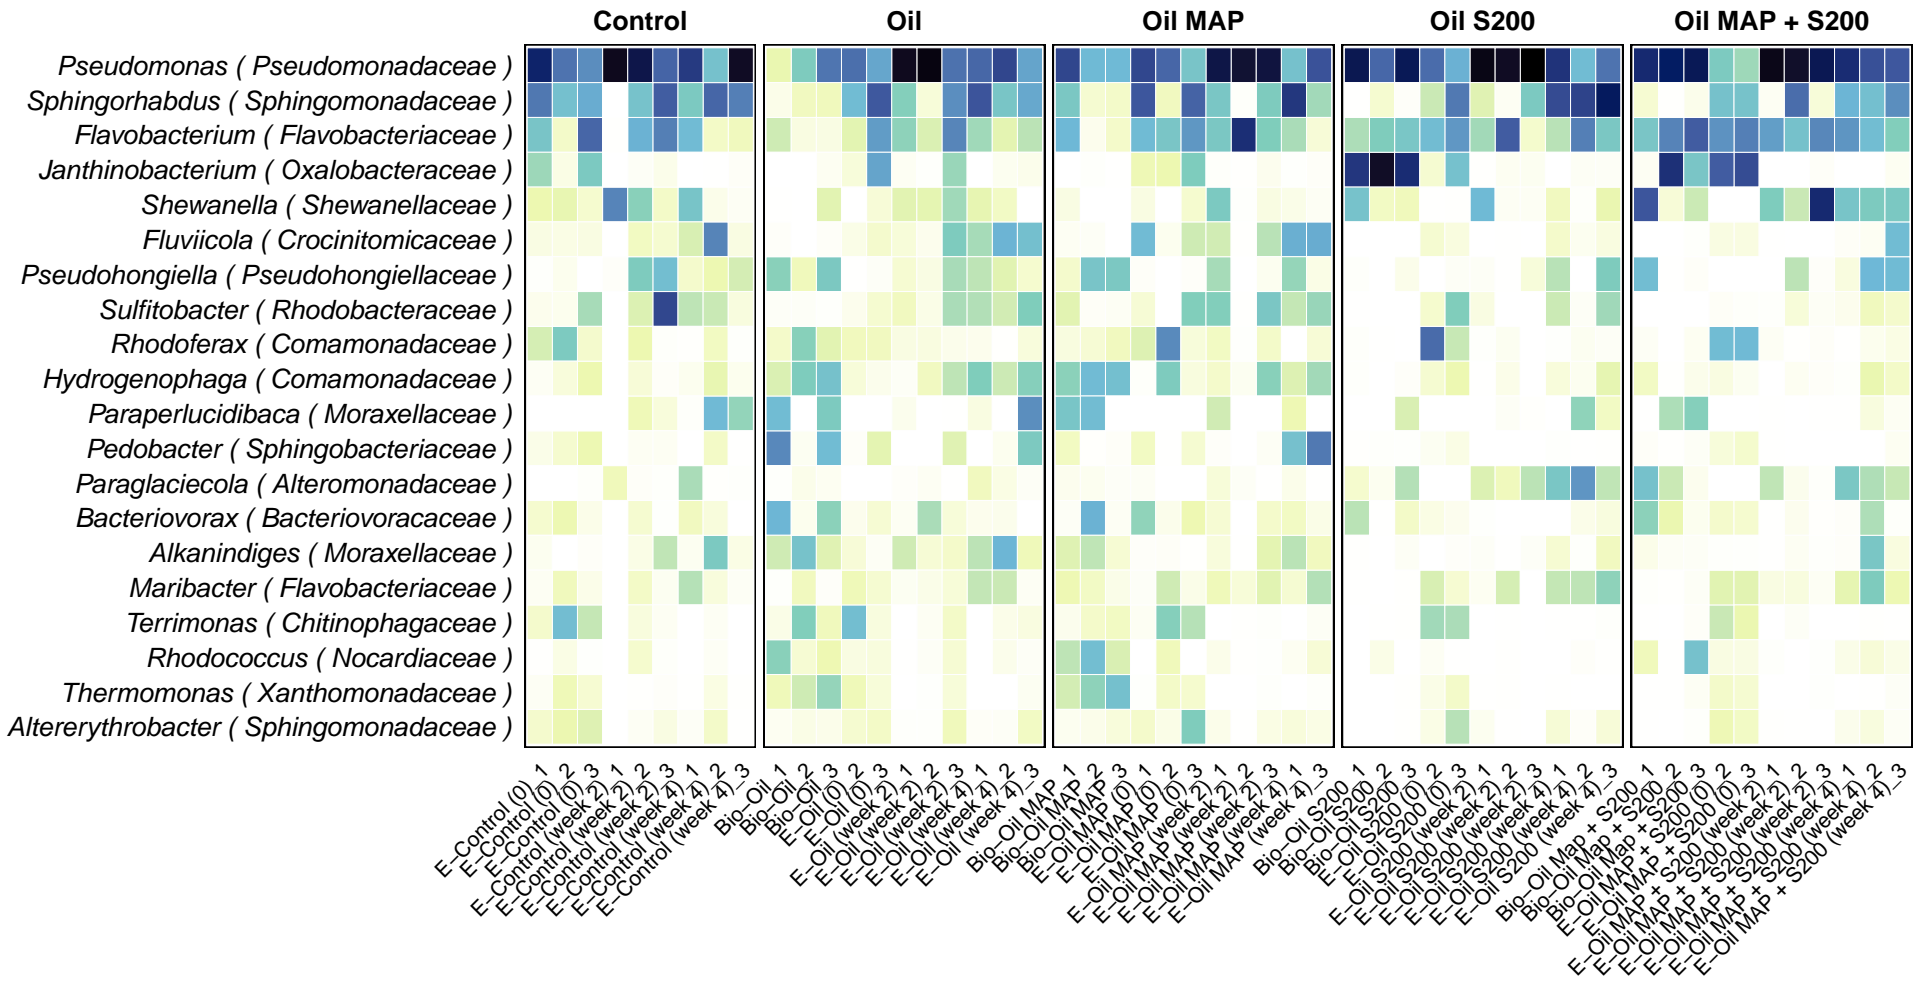

Supplement: 40793_2024_626_MOESM2_ESM.pdf [file 40793_2024_626_MOESM2_ESM.pdf]

# Effluent

Day 14 Day 32

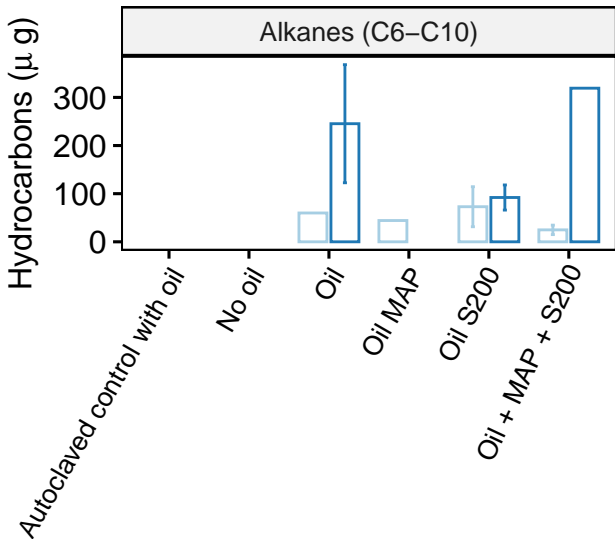

Supplement: 40793_2024_626_MOESM3_ESM.pdf [file 40793_2024_626_MOESM3_ESM.pdf]

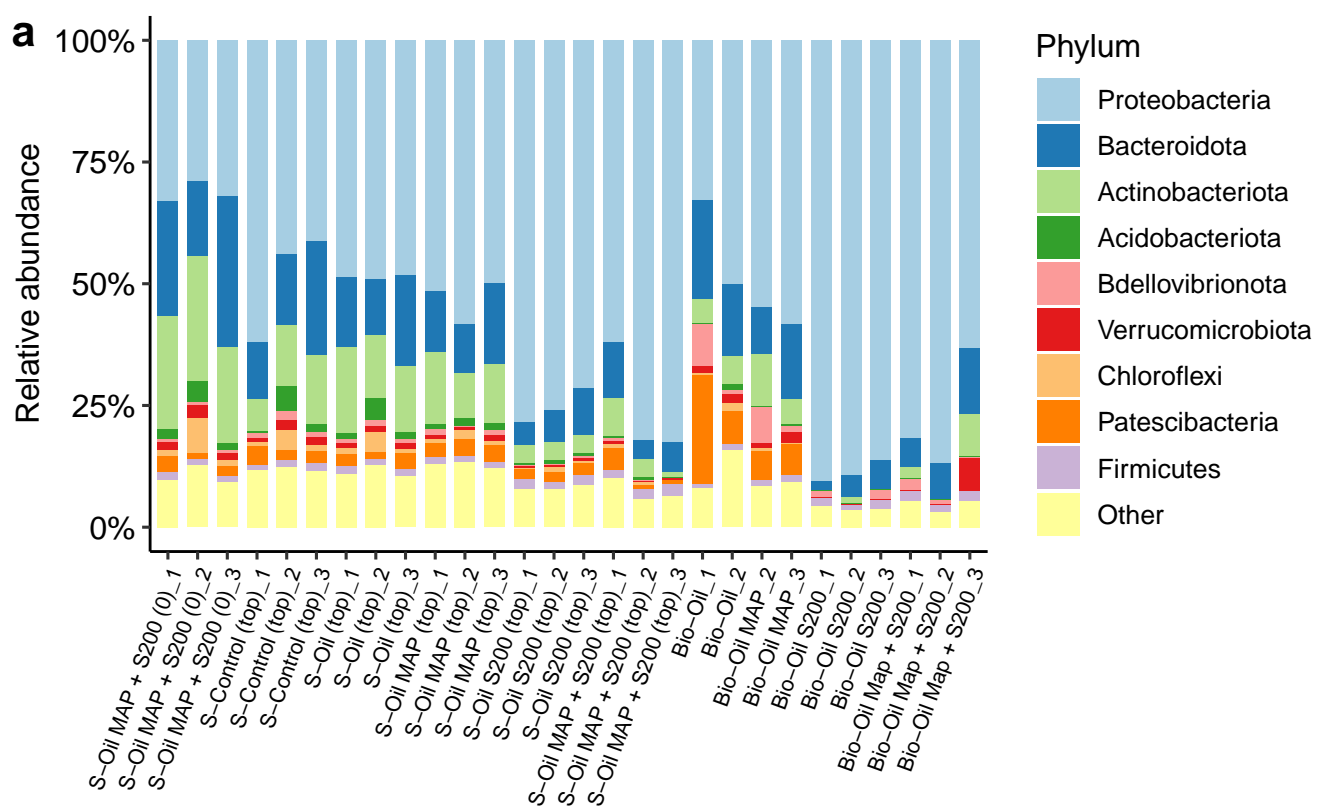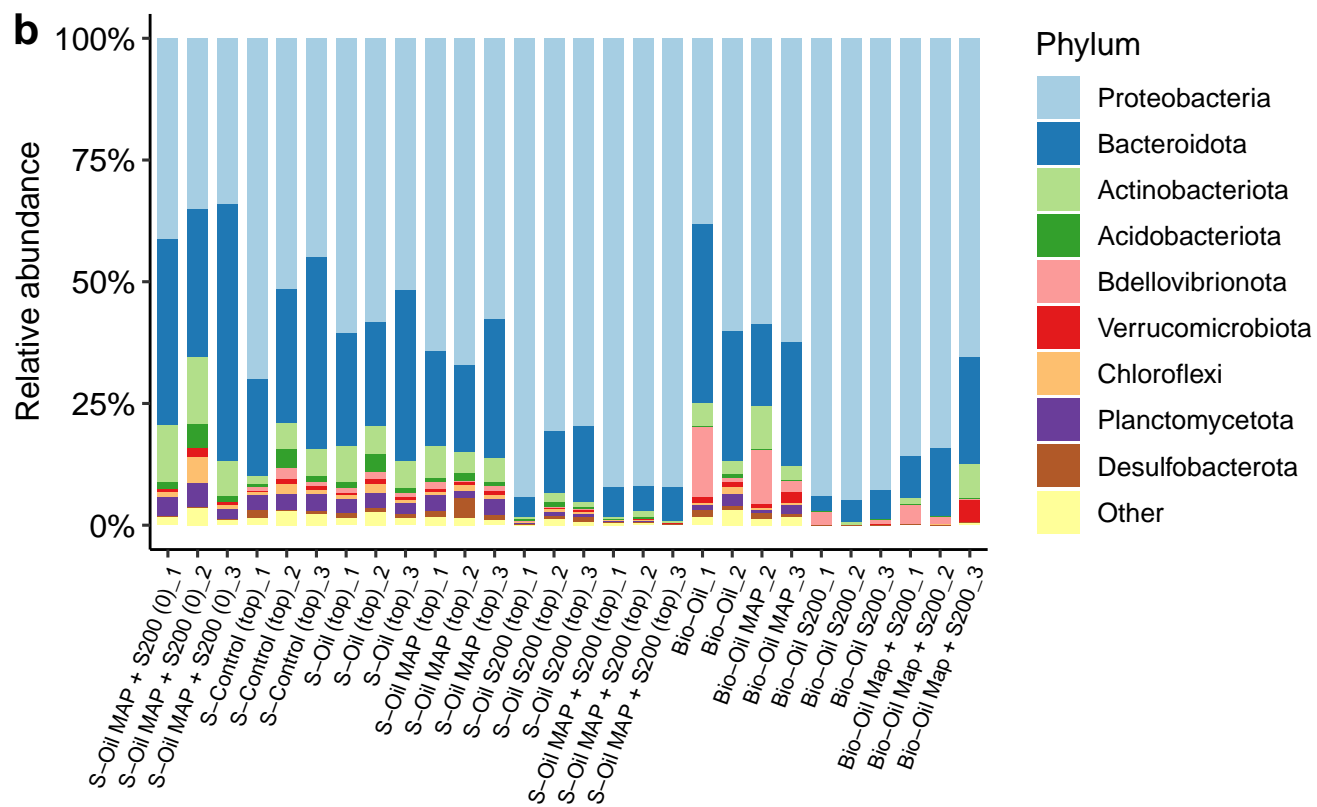

Supplement: 40793_2024_626_MOESM4_ESM.pdf [file 40793_2024_626_MOESM4_ESM.pdf]

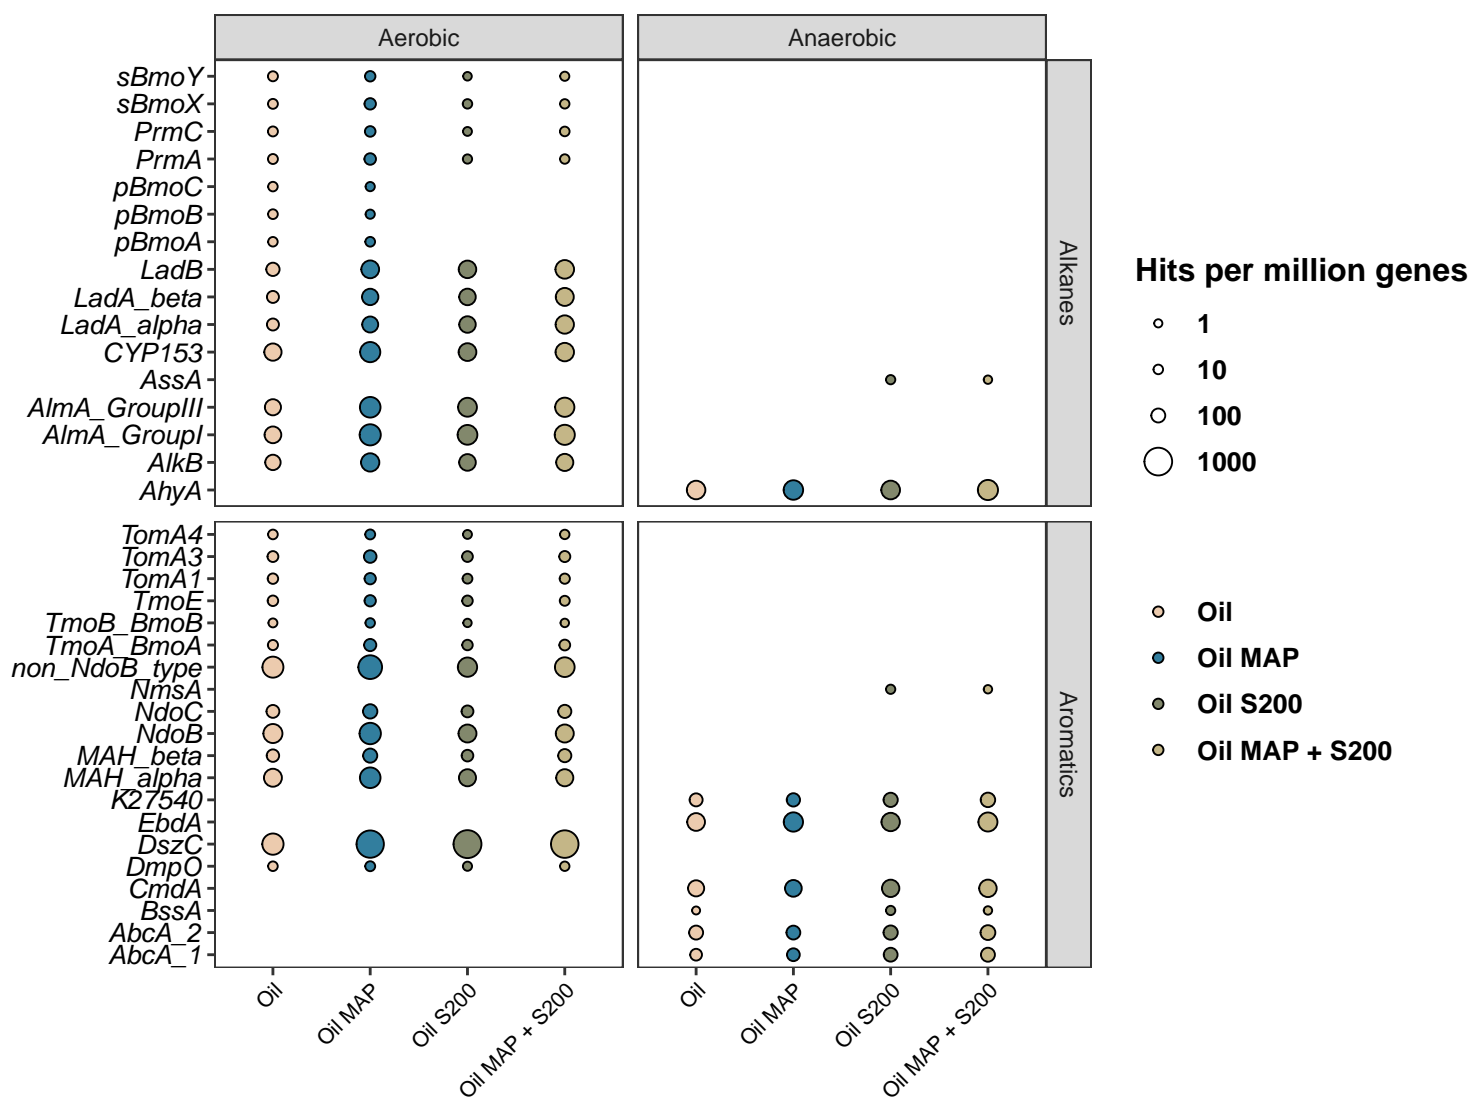

Supplement: 40793_2024_626_MOESM5_ESM.pdf [file 40793_2024_626_MOESM5_ESM.pdf]

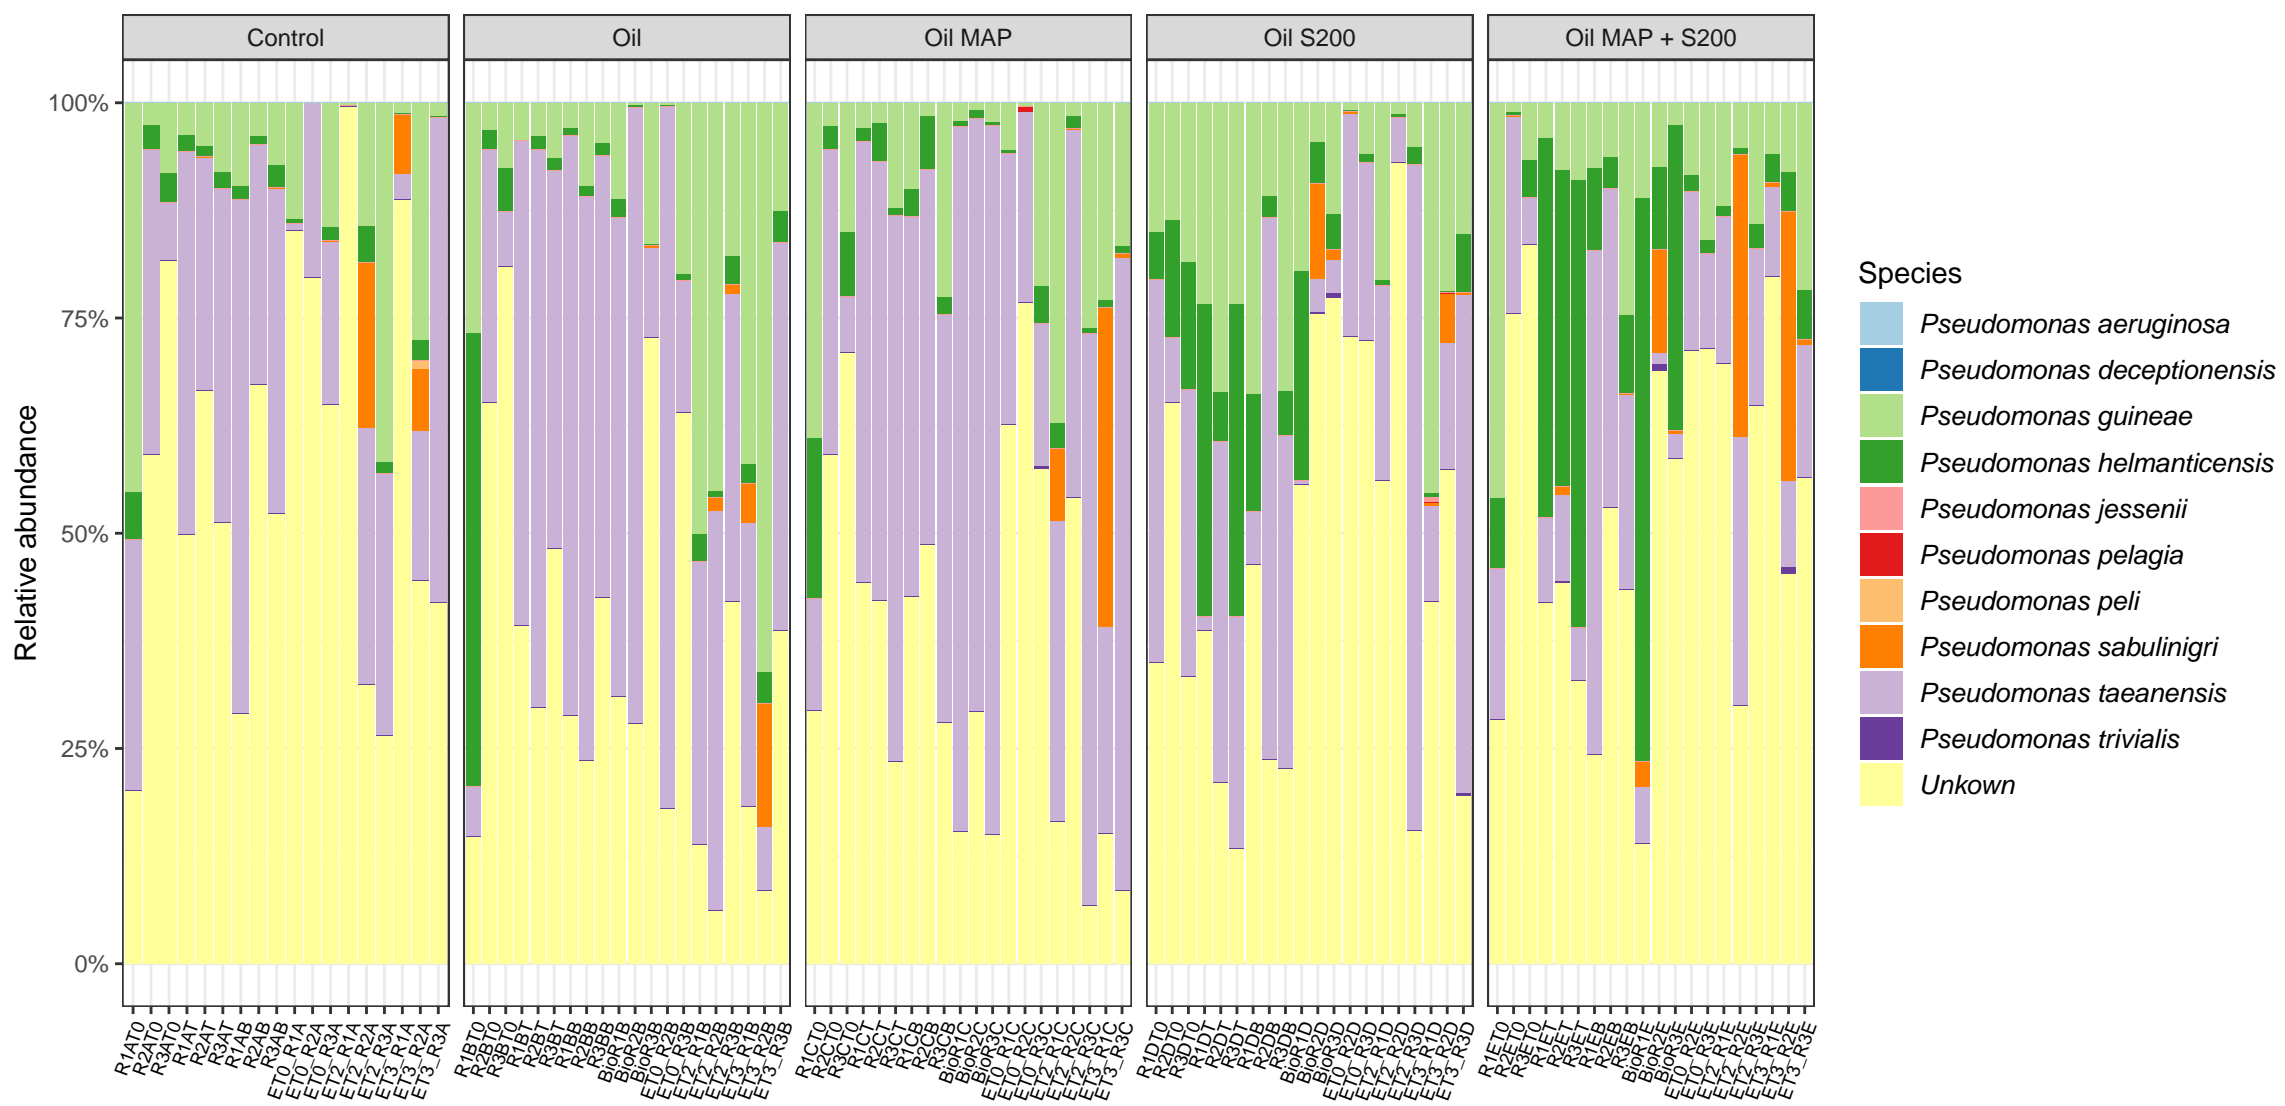

Supplement: 40793_2024_626_MOESM6_ESM.pdf [file 40793_2024_626_MOESM6_ESM.pdf]
